# Supplementary material for: Comparing BeadChip and WGS Genotyping: Non-Technical Failed Calling Is Attributable to Additional Variation within the Probe Target Sequence
Source: MDPI journal article supplement (doi:10.3390/genes13030485), 2022-03-09
Supplement: s1 [file s1]

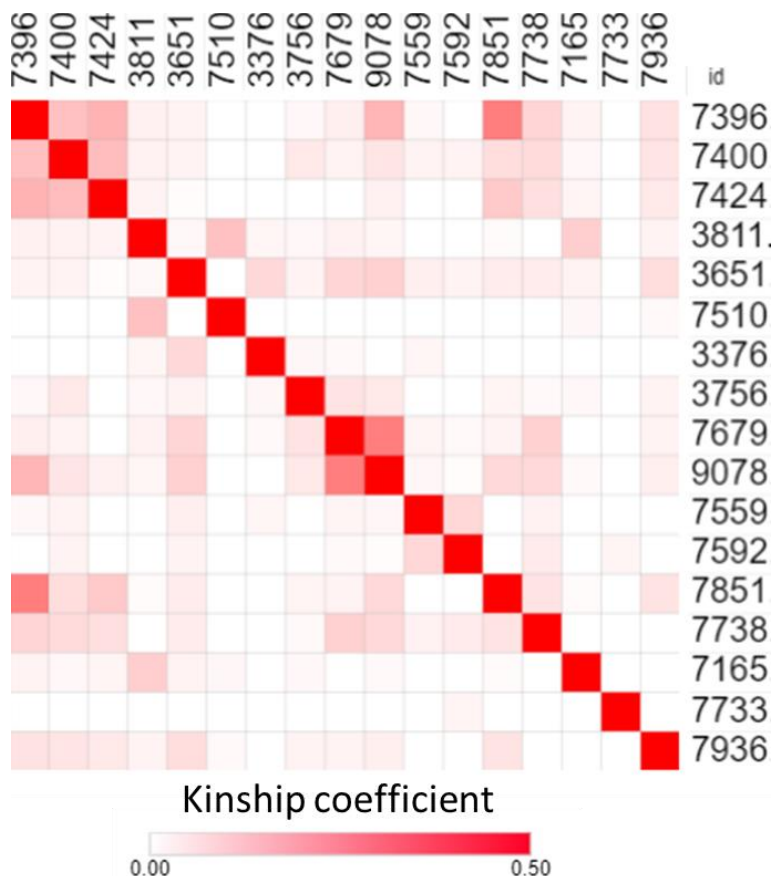

**Figure S1.** Heatmap of the clustered kinship matrix of 17 Israeli Holstein bulls that underwent whole-genome sequencing. A total of 42,848 informative SNPs were used to calculate the kinship coefficient for all possible pairs of bulls using the KING software [<https://doi.org/10.1093/bioinformatics/btq559>]. A custom-designed Perl script was further used to create a symmetric matrix of the bulls' kinship scores. X- and Y- axes denote the bulls' identifiers. Red color intensities mark the kinship coefficient of each pair, indicating the kinship level, where 0 indicates removed or no kinship, 0.25 indicates kinship from the 1<sup>st</sup> degree, whereas, the maximum of 0.5 denotes total identity on the diagonal.
